# Supplementary material for: Semiochemical responsive olfactory sensory neurons are sexually dimorphic and plastic
Source: eLife. 2020 Nov 24;9:e54501. doi: 10.7554/eLife.54501 (PMC7732343; doi:10.7554/eLife.54501)
Supplement: Figure 2—source data 1. [file elife-54501-fig2-data1.xlsx]

## Sheet: Sheet1
	Olfr910	Olfr912	Olfr1295
	sex-seperated female	sex-seperated female	sex-seperated female
	vs.	vs.	vs.
	sex-seperated male	sex-seperated male	sex-seperated male
Unpaired t test
P value	< 0.0001	< 0.0001	< 0.0001
P value summary	****	****	****
Significantly different? (P < 0.05)	Yes	Yes	Yes
One- or two-tailed P value?	Two-tailed	Two-tailed	Two-tailed
t, df	t=9.667 df=31	t=9.641 df=28	t=5.987 df=26
How big is the difference?
Mean ± SEM of column A	175.0 ± 19.75, n=16	165.1 ± 15.90, n=15	127.9 ± 21.85, n=13
Mean ± SEM of column B	559.0 ± 33.73, n=17	584.6 ± 40.50, n=15	340.0 ± 26.97, n=15
Difference between means	384.0 ± 39.72	419.5 ± 43.51	212.1 ± 35.43
95% confidence interval	303.0 to 465.0	330.4 to 508.6	139.3 to 284.9
R squared	0.7509	0.7685	0.5796
F test to compare variances
F,DFn, Dfd	3.100, 16, 15	6.485, 14, 14	1.757, 14, 12
P value	0.0341	0.0012	0.3339
P value summary	*	**	ns
Significantly different? (P < 0.05)	Yes	Yes	No
