# Supplementary material for: Semiochemical responsive olfactory sensory neurons are sexually dimorphic and plastic
Source: eLife. 2020 Nov 24;9:e54501. doi: 10.7554/eLife.54501 (PMC7732343; doi:10.7554/eLife.54501)
Supplement: Figure 3—source data 1. [file elife-54501-fig3-data1.xlsx]

## Sheet: Sheet1
Olfr910
Dunnett's multiple comparisons test	Mean Diff.	95% CI of diff.	Significant?	Summary	Adjusted P Value	A-?	No odor
No Odor vs. Mature male	-1.891	-2.232 to -1.550	Yes	****	< 0.0001	B	Mature male
No Odor vs. Mature female	-0.1053	-0.4390 to 0.2285	No	ns	0.7983	C	Mature female
No Odor vs. 1% Acetophenone	-0.05833	-0.3820 to 0.2654	No	ns	0.9516	D	1% Acetophenone
Test details	Mean 1	Mean 2	Mean Diff.	SE of diff.	n1	n2	q	DF
No Odor vs. Mature male	1.014	2.905	-1.891	0.1445	110	89	13.09	399
No Odor vs. Mature female	1.014	1.12	-0.1053	0.1415	110	96	0.7437	399
No Odor vs. 1% Acetophenone	1.014	1.073	-0.05833	0.1373	110	108	0.425	399
Olfr912
Dunnett's multiple comparisons test	Mean Diff.	95% CI of diff.	Significant?	Summary	Adjusted P Value	A-?	No odor
No Odor vs. Mature male	-1.343	-1.883 to -0.8030	Yes	****	< 0.0001	B	Mature male
No Odor vs. Mature female	0.00685	-0.5986 to 0.6123	No	ns	> 0.9999	C	Mature female
No Odor vs. 1% Acetophenone	0.06679	-0.5059 to 0.6395	No	ns	0.9857	D	1% Acetophenone
Test details	Mean 1	Mean 2	Mean Diff.	SE of diff.	n1	n2	q	DF
No Odor vs. Mature male	0.9497	2.293	-1.343	0.2282	49	72	5.884	216
No Odor vs. Mature female	0.9497	0.9428	0.00685	0.2559	49	44	0.02676	216
No Odor vs. 1% Acetophenone	0.9497	0.8829	0.06679	0.2421	49	55	0.2759	216
Olfr1295
Dunnett's multiple comparisons test	Mean Diff.	95% CI of diff.	Significant?	Summary	Adjusted P Value	A-?	No odor
No Odor vs. Mature male	-1.215	-1.658 to -0.7722	Yes	****	< 0.0001	B	Mature male
No Odor vs. Mature female	0.08813	-0.3582 to 0.5345	No	ns	0.9378	C	Mature female
No Odor vs. 1% Acetophenone	0.1503	-0.3437 to 0.6442	No	ns	0.8141	D	1% Acetophenone
Test details	Mean 1	Mean 2	Mean Diff.	SE of diff.	n1	n2	q	DF
No Odor vs. Mature male	1.157	2.372	-1.215	0.1876	69	101	6.477	326
No Odor vs. Mature female	1.157	1.069	0.08813	0.1891	69	97	0.466	326
No Odor vs. 1% Acetophenone	1.157	1.007	0.1503	0.2093	69	63	0.718	326
