# Supplementary material for: Semiochemical responsive olfactory sensory neurons are sexually dimorphic and plastic
Source: eLife. 2020 Nov 24;9:e54501. doi: 10.7554/eLife.54501 (PMC7732343; doi:10.7554/eLife.54501)
Supplement: Figure 4—source data 1. [file elife-54501-fig4-data1.xlsx]

## Sheet: Sheet1
Olfr910
Dunnett's multiple comparisons test	Mean Diff.	95% CI of diff.	Significant?	Summary	Adjusted P Value	A-?	No odor
No Odor vs. 0.01% SBT	-0.9763	-1.291 to -0.6614	Yes	****	< 0.0001	B	0.01% SBT
No Odor vs. 0.1% SBT	-1.215	-1.532 to -0.8978	Yes	****	< 0.0001	C	0.1% SBT
No Odor vs. 1% SBT	-1.631	-1.948 to -1.313	Yes	****	< 0.0001	D	1% SBT
No Odor vs. 1% Acetophenone	-0.1075	-0.4191 to 0.2040	No	ns	0.8137	E	1% Acetophenone
Test details	Mean 1	Mean 2	Mean Diff.	SE of diff.	n1	n2	q	DF
No Odor vs. 0.01% SBT	1.025	2.001	-0.9763	0.1287	196	169	7.585	865
No Odor vs. 0.1% SBT	1.025	2.24	-1.215	0.1296	196	165	9.377	865
No Odor vs. 1% SBT	1.025	2.656	-1.631	0.1298	196	164	12.57	865
No Odor vs. 1% Acetophenone	1.025	1.132	-0.1075	0.1273	196	176	0.8446	865
Olfr912
Dunnett's multiple comparisons test	Mean Diff.	95% CI of diff.	Significant?	Summary	Adjusted P Value	A-?	No odor
No Odor vs. 0.01% SBT	-0.5148	-0.8670 to -0.1627	Yes	**	0.0014	B	0.01% SBT
No Odor vs. 0.1% SBT	-0.7443	-1.094 to -0.3941	Yes	****	< 0.0001	C	0.1% SBT
No Odor vs. 1% SBT	-1.313	-1.665 to -0.9619	Yes	****	< 0.0001	D	1% SBT
No Odor vs. 1% Acetophenone	0.1103	-0.2620 to 0.4827	No	ns	0.8802	E	1% Acetophenone
Test details	Mean 1	Mean 2	Mean Diff.	SE of diff.	n1	n2	q	DF
No Odor vs. 0.01% SBT	1.012	1.527	-0.5148	0.1438	116	123	3.58	583
No Odor vs. 0.1% SBT	1.012	1.757	-0.7443	0.143	116	126	5.205	583
No Odor vs. 1% SBT	1.012	2.326	-1.313	0.1435	116	124	9.15	583
No Odor vs. 1% Acetophenone	1.012	0.9021	0.1103	0.1521	116	99	0.7256	583
Olfr1295
Dunnett's multiple comparisons test	Mean Diff.	95% CI of diff.	Significant?	Summary	Adjusted P Value	A-?	No odor
No Odor vs. 100μM MTMT	-0.9565	-1.369 to -0.5440	Yes	****	< 0.0001	B	100uM MTMT
No Odor vs. 10mM MTMT	-1.635	-2.059 to -1.211	Yes	****	< 0.0001	C	10mM MTMT
No Odor vs. 1% Acetophenone	0.1007	-0.3243 to 0.5256	No	ns	0.9001	D	1% Acetophenone
Test details	Mean 1	Mean 2	Mean Diff.	SE of diff.	n1	n2	q	DF
No Odor vs. 100μM MTMT	1.14	2.096	-0.9565	0.1751	116	158	5.463	547
No Odor vs. 10mM MTMT	1.14	2.775	-1.635	0.1801	116	139	9.08	547
No Odor vs. 1% Acetophenone	1.14	1.039	0.1007	0.1804	116	138	0.558	547
