# Supplementary material for: Semiochemical responsive olfactory sensory neurons are sexually dimorphic and plastic
Source: eLife. 2020 Nov 24;9:e54501. doi: 10.7554/eLife.54501 (PMC7732343; doi:10.7554/eLife.54501)
Supplement: Figure 5—source data 1. [file elife-54501-fig5-data1.xlsx]

## Sheet: Sheet1
Olfr910
Tukey's multiple comparisons test	Mean Diff.	95% CI of diff.	Significant?	Summary	Adjusted P Value
No odor male vs. 0.1% SBT male	-0.9496	-1.572 to -0.3274	Yes	***	0.0002	A-B
No odor male vs. 1% Ace male	0.2515	-0.3478 to 0.8508	No	ns	0.8347	A-C
No odor male vs. No odor female	0.2808	-0.2964 to 0.8580	No	ns	0.7297	A-D
No odor male vs. 0.1% SBT female	-0.8441	-1.428 to -0.2603	Yes	***	0.0006	A-E
No odor male vs. 1% Ace female	0.2552	-0.3441 to 0.8545	No	ns	0.8261	A-F
0.1% SBT male vs. 1% Ace male	1.201	0.5980 to 1.804	Yes	****	< 0.0001	B-C
0.1% SBT male vs. No odor female	1.23	0.6493 to 1.811	Yes	****	< 0.0001	B-D
0.1% SBT male vs. 0.1% SBT female	0.1055	-0.4822 to 0.6932	No	ns	0.9956	B-E
0.1% SBT male vs. 1% Ace female	1.205	0.6017 to 1.808	Yes	****	< 0.0001	B-F
1% Ace male vs. No odor female	0.02927	-0.5272 to 0.5858	No	ns	> 0.9999	C-D
1% Ace male vs. 0.1% SBT female	-1.096	-1.659 to -0.5322	Yes	****	< 0.0001	C-E
1% Ace male vs. 1% Ace female	0.003677	-0.5758 to 0.5831	No	ns	> 0.9999	C-F
No odor female vs. 0.1% SBT female	-1.125	-1.665 to -0.5851	Yes	****	< 0.0001	D-E
No odor female vs. 1% Ace female	-0.02559	-0.5821 to 0.5309	No	ns	> 0.9999	D-F
0.1% SBT female vs. 1% Ace female	1.099	0.5359 to 1.663	Yes	****	< 0.0001	E-F
Test details	Mean 1	Mean 2	Mean Diff.	SE of diff.	n1	n2	q	DF
No odor male vs. 0.1% SBT male	1.475	2.425	-0.9496	0.2169	43	42	6.192	290
No odor male vs. 1% Ace male	1.475	1.224	0.2515	0.2089	43	49	1.703	290
No odor male vs. No odor female	1.475	1.195	0.2808	0.2012	43	58	1.974	290
No odor male vs. 0.1% SBT female	1.475	2.32	-0.8441	0.2035	43	55	5.866	290
No odor male vs. 1% Ace female	1.475	1.22	0.2552	0.2089	43	49	1.728	290
0.1% SBT male vs. 1% Ace male	2.425	1.224	1.201	0.2102	42	49	8.08	290
0.1% SBT male vs. No odor female	2.425	1.195	1.23	0.2026	42	58	8.59	290
0.1% SBT male vs. 0.1% SBT female	2.425	2.32	0.1055	0.2049	42	55	0.7282	290
0.1% SBT male vs. 1% Ace female	2.425	1.22	1.205	0.2102	42	49	8.105	290
1% Ace male vs. No odor female	1.224	1.195	0.02927	0.194	49	58	0.2134	290
1% Ace male vs. 0.1% SBT female	1.224	2.32	-1.096	0.1964	49	55	7.89	290
1% Ace male vs. 1% Ace female	1.224	1.22	0.003677	0.202	49	49	0.02574	290
No odor female vs. 0.1% SBT female	1.195	2.32	-1.125	0.1882	58	55	8.455	290
No odor female vs. 1% Ace female	1.195	1.22	-0.02559	0.194	58	49	0.1866	290
0.1% SBT female vs. 1% Ace female	2.32	1.22	1.099	0.1964	55	49	7.916	290
Olfr912
Tukey's multiple comparisons test	Mean Diff.	95% CI of diff.	Significant?	Summary	Adjusted P Value
No odor male vs. 0.1% SBT male	-2.535	-3.782 to -1.287	Yes	****	< 0.0001	A-B
No odor male vs. 1% Ace male	0.2944	-1.038 to 1.627	No	ns	0.9883	A-C
No odor male vs. No odor female	0.6572	-0.5328 to 1.847	No	ns	0.6081	A-D
No odor male vs. 0.1% SBT female	-1.572	-2.773 to -0.3714	Yes	**	0.0029	A-E
No odor male vs. 1% Ace female	0.4328	-0.8387 to 1.704	No	ns	0.9246	A-F
0.1% SBT male vs. 1% Ace male	2.829	1.512 to 4.146	Yes	****	< 0.0001	B-C
0.1% SBT male vs. No odor female	3.192	2.019 to 4.365	Yes	****	< 0.0001	B-D
0.1% SBT male vs. 0.1% SBT female	0.9621	-0.2222 to 2.146	No	ns	0.1846	B-E
0.1% SBT male vs. 1% Ace female	2.967	1.712 to 4.223	Yes	****	< 0.0001	B-F
1% Ace male vs. No odor female	0.3628	-0.9006 to 1.626	No	ns	0.9627	C-D
1% Ace male vs. 0.1% SBT female	-1.867	-3.141 to -0.5930	Yes	***	0.0005	C-E
1% Ace male vs. 1% Ace female	0.1384	-1.202 to 1.479	No	ns	0.9997	C-F
No odor female vs. 0.1% SBT female	-2.23	-3.354 to -1.106	Yes	****	< 0.0001	D-E
No odor female vs. 1% Ace female	-0.2244	-1.423 to 0.9746	No	ns	0.9946	D-F
0.1% SBT female vs. 1% Ace female	2.005	0.7952 to 3.215	Yes	****	< 0.0001	E-F
Test details	Mean 1	Mean 2	Mean Diff.	SE of diff.	n1	n2	q	DF
No odor male vs. 0.1% SBT male	1.595	4.129	-2.535	0.434	38	40	8.258	236
No odor male vs. 1% Ace male	1.595	1.301	0.2944	0.4637	38	31	0.8977	236
No odor male vs. No odor female	1.595	0.9377	0.6572	0.4142	38	49	2.244	236
No odor male vs. 0.1% SBT female	1.595	3.167	-1.572	0.418	38	47	5.32	236
No odor male vs. 1% Ace female	1.595	1.162	0.4328	0.4425	38	37	1.383	236
0.1% SBT male vs. 1% Ace male	4.129	1.301	2.829	0.4585	40	31	8.726	236
0.1% SBT male vs. No odor female	4.129	0.9377	3.192	0.4083	40	49	11.06	236
0.1% SBT male vs. 0.1% SBT female	4.129	3.167	0.9621	0.4122	40	47	3.301	236
0.1% SBT male vs. 1% Ace female	4.129	1.162	2.967	0.437	40	37	9.602	236
1% Ace male vs. No odor female	1.301	0.9377	0.3628	0.4397	31	49	1.167	236
1% Ace male vs. 0.1% SBT female	1.301	3.167	-1.867	0.4433	31	47	5.955	236
1% Ace male vs. 1% Ace female	1.301	1.162	0.1384	0.4665	31	37	0.4196	236
No odor female vs. 0.1% SBT female	0.9377	3.167	-2.23	0.3912	49	47	8.06	236
No odor female vs. 1% Ace female	0.9377	1.162	-0.2244	0.4173	49	37	0.7605	236
0.1% SBT female vs. 1% Ace female	3.167	1.162	2.005	0.4211	47	37	6.734	236
Olfr1295
Tukey's multiple comparisons test	Mean Diff.	95% CI of diff.	Significant?	Summary	Adjusted P Value
No odor male vs. 10mM MTMT male	-2.121	-3.062 to -1.180	Yes	****	< 0.0001	A-B
No odor male vs. 1% Ace male	0.1679	-0.6409 to 0.9767	No	ns	0.991	A-C
No odor male vs. No odor female	0.2958	-0.5362 to 1.128	No	ns	0.9088	A-D
No odor male vs. 10mM MTMT female	-1.621	-2.458 to -0.7834	Yes	****	< 0.0001	A-E
No odor male vs. 1% Ace female	0.4291	-0.4268 to 1.285	No	ns	0.699	A-F
10mM MTMT male vs. 1% Ace male	2.289	1.441 to 3.137	Yes	****	< 0.0001	B-C
10mM MTMT male vs. No odor female	2.417	1.547 to 3.287	Yes	****	< 0.0001	B-D
10mM MTMT male vs. 10mM MTMT female	0.5005	-0.3748 to 1.376	No	ns	0.5675	B-E
10mM MTMT male vs. 1% Ace female	2.55	1.658 to 3.443	Yes	****	< 0.0001	B-F
1% Ace male vs. No odor female	0.1279	-0.5973 to 0.8531	No	ns	0.9958	C-D
1% Ace male vs. 10mM MTMT female	-1.789	-2.520 to -1.057	Yes	****	< 0.0001	C-E
1% Ace male vs. 1% Ace female	0.2612	-0.4913 to 1.014	No	ns	0.9171	C-F
No odor female vs. 10mM MTMT female	-1.917	-2.674 to -1.160	Yes	****	< 0.0001	D-E
No odor female vs. 1% Ace female	0.1333	-0.6441 to 0.9107	No	ns	0.9963	D-F
10mM MTMT female vs. 1% Ace female	2.05	1.267 to 2.833	Yes	****	< 0.0001	E-F
Test details	Mean 1	Mean 2	Mean Diff.	SE of diff.	n1	n2	q	DF
No odor male vs. 10mM MTMT male	1.405	3.526	-2.121	0.3262	22	19	9.196	163
No odor male vs. 1% Ace male	1.405	1.237	0.1679	0.2805	22	37	0.8468	163
No odor male vs. No odor female	1.405	1.109	0.2958	0.2885	22	32	1.45	163
No odor male vs. 10mM MTMT female	1.405	3.026	-1.621	0.2904	22	31	7.894	163
No odor male vs. 1% Ace female	1.405	0.9759	0.4291	0.2968	22	28	2.045	163
10mM MTMT male vs. 1% Ace male	3.526	1.237	2.289	0.294	19	37	11.01	163
10mM MTMT male vs. No odor female	3.526	1.109	2.417	0.3017	19	32	11.33	163
10mM MTMT male vs. 10mM MTMT female	3.526	3.026	0.5005	0.3035	19	31	2.332	163
10mM MTMT male vs. 1% Ace female	3.526	0.9759	2.55	0.3096	19	28	11.65	163
1% Ace male vs. No odor female	1.237	1.109	0.1279	0.2515	37	32	0.7192	163
1% Ace male vs. 10mM MTMT female	1.237	3.026	-1.789	0.2536	37	31	9.974	163
1% Ace male vs. 1% Ace female	1.237	0.9759	0.2612	0.2609	37	28	1.415	163
No odor female vs. 10mM MTMT female	1.109	3.026	-1.917	0.2625	32	31	10.33	163
No odor female vs. 1% Ace female	1.109	0.9759	0.1333	0.2696	32	28	0.6991	163
10mM MTMT female vs. 1% Ace female	3.026	0.9759	2.05	0.2716	31	28	10.67	163
