# Supplementary material for: Semiochemical responsive olfactory sensory neurons are sexually dimorphic and plastic
Source: eLife. 2020 Nov 24;9:e54501. doi: 10.7554/eLife.54501 (PMC7732343; doi:10.7554/eLife.54501)
Supplement: Figure 6—source data 1. [file elife-54501-fig6-data1.xlsx]

## Sheet: Sheet1
Olfr910
Tukey's multiple comparisons test	Mean Diff.	95% CI of diff.	Significant?	Summary	Adjusted P Value
sex-seperated male vs. sex-seperated female	-384	-472.6 to -295.4	Yes	****	< 0.0001	A-B
sex-seperated male vs. sex-combined male	9.55	-90.09 to 109.2	No	ns	0.9942	A-C
sex-seperated male vs. sex-combined female	12.42	-77.52 to 102.4	No	ns	0.9831	A-D
sex-seperated female vs. sex-combined male	393.6	295.1 to 492.0	Yes	****	< 0.0001	B-C
sex-seperated female vs. sex-combined female	396.4	307.8 to 485.0	Yes	****	< 0.0001	B-D
sex-combined male vs. sex-combined female	2.868	-96.77 to 102.5	No	ns	0.9998	C-D
Test details	Mean 1	Mean 2	Mean Diff.	SE of diff.	n1	n2	q	DF
sex-seperated male vs. sex-seperated female	175	559	-384	33.46	16	17	16.23	56
sex-seperated male vs. sex-combined male	175	165.4	9.55	37.63	16	11	0.3589	56
sex-seperated male vs. sex-combined female	175	162.6	12.42	33.97	16	16	0.517	56
sex-seperated female vs. sex-combined male	559	165.4	393.6	37.18	17	11	14.97	56
sex-seperated female vs. sex-combined female	559	162.6	396.4	33.46	17	16	16.75	56
sex-combined male vs. sex-combined female	165.4	162.6	2.868	37.63	11	16	0.1078	56
Olfr912
Tukey's multiple comparisons test	Mean Diff.	95% CI of diff.	Significant?	Summary	Adjusted P Value
sex-seperated male vs. sex-seperated female	-419.5	-511.1 to -327.9	Yes	****	< 0.0001	A-B
sex-seperated male vs. sex-combined male	-8.05	-99.67 to 83.57	No	ns	0.9955	A-C
sex-seperated male vs. sex-combined female	25.37	-64.81 to 115.5	No	ns	0.8786	A-D
sex-seperated female vs. sex-combined male	411.5	319.8 to 503.1	Yes	****	< 0.0001	B-C
sex-seperated female vs. sex-combined female	444.9	354.7 to 535.1	Yes	****	< 0.0001	B-D
sex-combined male vs. sex-combined female	33.42	-56.76 to 123.6	No	ns	0.7609	C-D
Test details	Mean 1	Mean 2	Mean Diff.	SE of diff.	n1	n2	q	DF
sex-seperated male vs. sex-seperated female	165.1	584.6	-419.5	34.62	15	15	17.14	57
sex-seperated male vs. sex-combined male	165.1	173.1	-8.05	34.62	15	15	0.3288	57
sex-seperated male vs. sex-combined female	165.1	139.7	25.37	34.08	15	16	1.053	57
sex-seperated female vs. sex-combined male	584.6	173.1	411.5	34.62	15	15	16.81	57
sex-seperated female vs. sex-combined female	584.6	139.7	444.9	34.08	15	16	18.46	57
sex-combined male vs. sex-combined female	173.1	139.7	33.42	34.08	15	16	1.387	57
Olfr1295
Tukey's multiple comparisons test	Mean Diff.	95% CI of diff.	Significant?	Summary	Adjusted P Value
sex-seperated male vs. sex-seperated female	-212.1	-303.3 to -120.9	Yes	****	< 0.0001	A-B
sex-seperated male vs. sex-combined male	11.58	-81.10 to 104.3	No	ns	0.9873	A-C
sex-seperated male vs. sex-combined female	11.18	-83.20 to 105.6	No	ns	0.9891	A-D
sex-seperated female vs. sex-combined male	223.7	134.3 to 313.1	Yes	****	< 0.0001	B-C
sex-seperated female vs. sex-combined female	223.3	132.1 to 314.5	Yes	****	< 0.0001	B-D
sex-combined male vs. sex-combined female	-0.3931	-93.07 to 92.29	No	ns	> 0.9999	C-D
Test details	Mean 1	Mean 2	Mean Diff.	SE of diff.	n1	n2	q	DF
sex-seperated male vs. sex-seperated female	127.9	340	-212.1	34.33	13	15	8.737	51
sex-seperated male vs. sex-combined male	127.9	116.3	11.58	34.9	13	14	0.4692	51
sex-seperated male vs. sex-combined female	127.9	116.7	11.18	35.54	13	13	0.4451	51
sex-seperated female vs. sex-combined male	340	116.3	223.7	33.67	15	14	9.396	51
sex-seperated female vs. sex-combined female	340	116.7	223.3	34.33	15	13	9.198	51
sex-combined male vs. sex-combined female	116.3	116.7	-0.3931	34.9	14	13	0.01593	51
