# Supplementary material for: Semiochemical responsive olfactory sensory neurons are sexually dimorphic and plastic
Source: eLife. 2020 Nov 24;9:e54501. doi: 10.7554/eLife.54501 (PMC7732343; doi:10.7554/eLife.54501)
Supplement: Figure 7—figure supplement 1—source data 1. [file elife-54501-fig7-figsupp1-data1.xlsx]

## Sheet: Sheet1
	olfr1437
	Sex-seperated female
	vs.
	Sex-seperated male
Unpaired t test
P value	< 0.0001
P value summary	****
Significantly different? (P < 0.05)	Yes
One- or two-tailed P value?	Two-tailed
t, df	t=5.099 df=27
How big is the difference?
Mean ± SEM of column A	684.2 ± 45.89, n=14
Mean ± SEM of column B	351.5 ± 46.23, n=15
Difference between means	-332.6 ± 65.23
95% confidence interval	-466.5 to -198.8
R squared	0.4906
F test to compare variances
F,DFn, Dfd	1.088, 14, 13
P value	0.8852
P value summary	ns
Significantly different? (P < 0.05)	No
