# Supplementary material for: Semiochemical responsive olfactory sensory neurons are sexually dimorphic and plastic
Source: eLife. 2020 Nov 24;9:e54501. doi: 10.7554/eLife.54501 (PMC7732343; doi:10.7554/eLife.54501)
Supplement: Figure 8—source data 1. [file elife-54501-fig8-data1.xlsx]

## Sheet: 910+912+1295
p_val	avg_logFC	pct.1	pct.2	p_val_adj	cluster	gene
2.52055e-50	1.12945	0.246	0.015	9.34797e-46	female_enriched	Scg2
2.13843e-36	1.16884	0.354	0.041	7.9308e-32	female_enriched	Ptprn
1.32763e-27	0.738143	0.138	0.009	4.92377e-23	female_enriched	Pde10a
7.26069e-23	0.791472	0.262	0.035	2.69277e-18	female_enriched	Hap1
1.56091e-18	1.6793	0.831	0.442	5.78896e-14	female_enriched	Ppa1
1.23871e-16	0.772717	0.985	0.78	4.59399e-12	female_enriched	Pcp4l1
1.69011e-16	0.8617	0.692	0.25	6.26812e-12	female_enriched	Syt4
2.31841e-16	0.750756	1	0.953	8.5983e-12	female_enriched	S100a5
2.21914e-15	0.590738	0.108	0.01	8.23014e-11	female_enriched	Resp18
9.34154e-15	0.512911	0.185	0.027	3.4645e-10	female_enriched	Plvap
1.02354e-13	0.875734	0.692	0.286	3.796e-09	female_enriched	Dlg2
2.603e-13	1.42159	0.185	0.03	9.65376e-09	female_enriched	Avp
2.11662e-12	0.526401	0.415	0.118	7.84989e-08	female_enriched	Il6st
1.18633e-11	0.374898	0.123	0.016	4.39975e-07	female_enriched	Vim
1.59377e-11	0.809419	0.108	0.013	5.91083e-07	female_enriched	Sprr1a
1.2057e-10	0.536494	0.292	0.075	4.47158e-06	female_enriched	Mbl2
1.20764e-10	0.501157	0.231	0.051	4.47878e-06	female_enriched	Dclk1
3.81877e-10	0.61092	0.662	0.288	1.41627e-05	female_enriched	Ptn
4.6581e-10	0.791689	0.662	0.323	1.72755e-05	female_enriched	Kcnmb3
5.17519e-10	0.639727	0.154	0.027	1.91932e-05	female_enriched	Uty
2.23509e-09	0.42121	0.138	0.024	8.28927e-05	female_enriched	Ppp1r3c
4.29657e-09	0.608358	0.154	0.03	0.000159347	female_enriched	Galnt15
9.07103e-09	0.323799	0.123	0.02	0.000336417	female_enriched	S100a2
1.03973e-08	0.659992	0.231	0.061	0.000385604	female_enriched	Anks1b
1.28963e-08	0.601536	0.231	0.06	0.000478286	female_enriched	Cfap77
1.60991e-08	0.463354	0.123	0.021	0.000597069	female_enriched	Kcnq1
2.08876e-08	0.262757	0.108	0.017	0.000774658	female_enriched	Nfatc2
2.99369e-08	0.841142	0.308	0.102	0.00111027	female_enriched	Rasgrp4
3.38398e-08	0.414661	0.2	0.049	0.00125502	female_enriched	Serpini1
4.57938e-08	0.545812	0.323	0.105	0.00169836	female_enriched	Nrp1
5.18947e-08	0.359435	0.108	0.018	0.00192462	female_enriched	S100a4
5.19878e-08	0.559596	0.831	0.66	0.00192807	female_enriched	Ldhb
1.24043e-07	0.465121	0.277	0.087	0.00460038	female_enriched	Xbp1
1.31428e-07	0.351337	0.215	0.058	0.00487428	female_enriched	Lmo2
1.66723e-07	0.330887	1	0.903	0.00618326	female_enriched	Ckb
2.22361e-07	0.568868	0.277	0.09	0.0082467	female_enriched	Pirt
2.41691e-07	0.517917	0.123	0.024	0.0089636	female_enriched	C230038L03Rik
4.86427e-07	0.470237	0.846	0.564	0.0180401	female_enriched	Ubl3

## Sheet: 1437+235
	p_val	avg_logFC	pct.1	pct.2	p_val_adj	cluster	gene
Gm7534.1	7.12244e-15	0.884044	0.167	0.016	2.6415e-10	male_enriched	Gm7534
Stbd1.1	1.38128e-10	0.814469	0.405	0.103	5.12275e-06	male_enriched	Stbd1
Ephx4.1	6.00085e-09	1.06863	0.738	0.372	0.000222554	male_enriched	Ephx4
Sgpl1.1	5.96413e-08	0.784555	0.81	0.538	0.00221192	male_enriched	Sgpl1
Cd55.1	6.42091e-07	0.917237	0.357	0.114	0.0238132	male_enriched	Cd55
Prkd2.1	7.54264e-07	0.622402	0.143	0.025	0.0279734	male_enriched	Prkd2
Snx1.1	9.30843e-07	0.669929	0.333	0.102	0.0345222	male_enriched	Snx1
Dcdc2a.1	9.92076e-07	0.636437	0.905	0.653	0.0367931	male_enriched	Dcdc2a

## Sheet: 910
p_val	avg_logFC	pct.1	pct.2	p_val_adj	cluster	gene
4.43069e-78	1.81442	0.524	0.015	1.64321e-73	Olfr910	Scg2
6.34202e-39	0.455554	0.143	0.002	2.35207e-34	Olfr910	Cpne8
2.30165e-24	1.75054	0.476	0.042	8.53614e-20	Olfr910	Ptprn
4.30947e-21	1.70212	0.381	0.03	1.59825e-16	Olfr910	Avp
5.16199e-21	0.747038	0.19	0.008	1.91443e-16	Olfr910	Slc7a8
3.59401e-16	0.388125	0.143	0.006	1.33291e-11	Olfr910	Gapdh-ps14
5.73083e-15	2.3554	1	0.443	2.12539e-10	Olfr910	Ppa1
3.76673e-12	0.649838	0.238	0.021	1.39697e-07	Olfr910	S100a2
1.26936e-10	1.12869	0.143	0.009	4.70768e-06	Olfr910	Pde10a
4.56576e-10	0.879455	0.286	0.035	1.6933e-05	Olfr910	Hap1
1.41954e-09	0.635626	0.143	0.01	5.26467e-05	Olfr910	Rtn4ip1
2.75164e-09	0.939654	1	0.954	0.00010205	Olfr910	S100a5
2.98977e-09	0.363378	0.143	0.01	0.000110882	Olfr910	Tmem198
9.38831e-09	0.471067	0.143	0.011	0.000348184	Olfr910	Tyw3
3.89131e-08	0.801298	0.143	0.012	0.00144317	Olfr910	Fmnl1
8.97995e-08	0.728314	0.333	0.058	0.00333039	Olfr910	Lmo2
1.25701e-07	1.40017	0.143	0.013	0.00466188	Olfr910	Sprr1a
1.27281e-07	1.21664	0.429	0.099	0.00472048	Olfr910	Dmkn
1.80677e-07	0.557781	0.19	0.022	0.00670077	Olfr910	Smg9
2.13195e-07	0.886427	0.19	0.023	0.00790677	Olfr910	Dgkg
2.79479e-07	0.432565	0.143	0.013	0.0103651	Olfr910	Gm6316
3.91889e-07	0.973818	0.476	0.122	0.014534	Olfr910	Pcdh7
4.48327e-07	0.47092	0.143	0.014	0.0166271	Olfr910	Map10
5.60346e-07	0.789547	0.476	0.119	0.0207815	Olfr910	Il6st
5.86023e-07	0.385183	0.143	0.014	0.0217338	Olfr910	Zfp763
5.9699e-07	0.721912	0.286	0.049	0.0221406	Olfr910	Serpini1
6.7209e-07	0.967148	0.19	0.024	0.0249258	Olfr910	C230038L03Rik
6.87722e-07	0.947897	0.524	0.142	0.0255055	Olfr910	Cltb
7.84846e-07	0.623229	0.143	0.014	0.0291076	Olfr910	Ets2
1.00068e-06	0.850688	0.286	0.051	0.0371121	Olfr910	Dclk1
1.01071e-06	0.7633	1	0.78	0.0374841	Olfr910	Pcp4l1
1.1104e-06	0.301538	0.143	0.014	0.0411814	Olfr910	Atg7
1.20948e-06	0.844355	0.429	0.102	0.0448562	Olfr910	Rasgrp4
1.2772e-06	0.910387	0.714	0.251	0.0473676	Olfr910	Syt4

## Sheet: 912
p_val	avg_logFC	pct.1	pct.2	p_val_adj	cluster	gene
0	0.51168	0.125	0	0	Olfr912	Dmrtb1
0	0.510186	0.125	0	0	Olfr912	Epha8
0	0.371037	0.125	0	0	Olfr912	Gm47088
0	0.355003	0.125	0	0	Olfr912	A230057D06Rik
8.60481e-242	0.35483	0.125	0	3.19126e-237	Olfr912	Col4a1
9.02626e-162	0.845912	0.125	0	3.34757e-157	Olfr912	Tfap2a
9.02626e-162	0.509714	0.125	0	3.34757e-157	Olfr912	Gm12043
9.81114e-162	0.388115	0.125	0	3.63866e-157	Olfr912	Gm35595
9.81114e-162	0.334066	0.125	0	3.63866e-157	Olfr912	Gm15014
9.81114e-162	0.33387	0.125	0	3.63866e-157	Olfr912	Ndn
1.06642e-161	0.387566	0.125	0	3.95502e-157	Olfr912	Cd300c2
1.06642e-161	0.370272	0.125	0	3.95502e-157	Olfr912	Dlgap5
1.09298e-121	0.509066	0.125	0	4.05354e-117	Olfr912	Gm26158
1.08201e-97	0.51003	0.125	0	4.01286e-93	Olfr912	Adap2
1.19588e-97	0.387348	0.125	0	4.43517e-93	Olfr912	Gm27037
1.1394e-81	0.510696	0.125	0	4.22568e-77	Olfr912	Gm16353
1.21294e-81	0.387044	0.125	0	4.49843e-77	Olfr912	Gm11270
1.23849e-81	0.507917	0.125	0	4.59319e-77	Olfr912	Gm48048
1.34618e-81	0.318562	0.125	0	4.99257e-77	Olfr912	Il7
3.20956e-70	0.508841	0.125	0	1.19033e-65	Olfr912	Adgre5
3.44741e-70	0.34142	0.125	0	1.27854e-65	Olfr912	Gm4596
1.16089e-69	0.475538	0.25	0.001	4.3054e-65	Olfr912	Gm43915
2.38179e-67	0.627766	0.25	0.002	8.83336e-63	Olfr912	BB218582
1.37529e-61	0.386491	0.125	0	5.10053e-57	Olfr912	Tspan4
1.41897e-61	0.33304	0.125	0	5.26255e-57	Olfr912	Gm11241
1.46404e-61	0.340605	0.125	0	5.42969e-57	Olfr912	Cxcl12
6.77624e-55	0.507445	0.125	0	2.5131e-50	Olfr912	Gm44083
6.77624e-55	0.506981	0.125	0	2.5131e-50	Olfr912	Fzd5
1.5398e-49	0.331649	0.125	0.001	5.71067e-45	Olfr912	Bdnf
1.0533e-46	0.331304	0.25	0.002	3.90637e-42	Olfr912	Camk2b
3.64856e-45	0.384384	0.125	0.001	1.35314e-40	Olfr912	Gm9634
3.99601e-45	0.350493	0.125	0.001	1.482e-40	Olfr912	Gm8850
3.68791e-43	1.64302	0.625	0.016	1.36773e-38	Olfr912	Scg2
6.75564e-42	0.485995	0.25	0.003	2.50546e-37	Olfr912	Gm6240
1.6192e-41	0.506321	0.125	0.001	6.00514e-37	Olfr912	Gm11977
1.65332e-41	0.50601	0.125	0.001	6.13168e-37	Olfr912	Gm43021
4.3346e-41	0.721109	0.25	0.003	1.60757e-36	Olfr912	Gm7820
3.46252e-40	0.466002	0.25	0.003	1.28414e-35	Olfr912	Gm7048
2.09814e-38	0.383749	0.125	0.001	7.78136e-34	Olfr912	Gm9423
2.22281e-38	0.381068	0.125	0.001	8.24374e-34	Olfr912	A730091E23Rik
2.22281e-38	0.33735	0.125	0.001	8.24374e-34	Olfr912	A830052D11Rik
8.79688e-36	0.506968	0.125	0.001	3.2625e-31	Olfr912	Gm19337
1.7087e-33	0.507203	0.125	0.001	6.33707e-29	Olfr912	Gm5184
1.8886e-33	0.337907	0.125	0.001	7.00426e-29	Olfr912	AC134548.2
4.31243e-33	0.716979	0.25	0.003	1.59935e-28	Olfr912	Cd44
1.83246e-31	0.506019	0.125	0.001	6.79605e-27	Olfr912	Gm49179
1.92049e-31	0.337561	0.125	0.001	7.12252e-27	Olfr912	Acp6
2.01271e-31	0.347429	0.125	0.001	7.46455e-27	Olfr912	Psmb9
1.65514e-30	0.476563	0.25	0.004	6.13843e-26	Olfr912	Tgif1
1.05524e-29	0.504868	0.125	0.001	3.91357e-25	Olfr912	Gm18969
1.07089e-29	0.50601	0.125	0.001	3.97163e-25	Olfr912	Gm10566
2.36123e-28	0.44125	0.25	0.004	8.75709e-24	Olfr912	Mir5136
4.15888e-28	0.50542	0.125	0.001	1.54241e-23	Olfr912	Gm42732
4.21712e-28	0.382	0.125	0.001	1.564e-23	Olfr912	AC110534.4
1.08599e-26	0.34961	0.125	0.001	4.0276e-22	Olfr912	Gm40598
1.19085e-26	0.326499	0.125	0.001	4.41652e-22	Olfr912	Gm9246
2.44199e-26	0.818187	0.25	0.004	9.0566e-22	Olfr912	Slc2a4
2.50682e-26	0.699264	0.25	0.004	9.29706e-22	Olfr912	Gm14248
1.80623e-25	1.6994	0.375	0.01	6.69875e-21	Olfr912	Resp18
2.07485e-25	0.501412	0.125	0.001	7.69498e-21	Olfr912	Gm29642
2.15421e-25	0.347194	0.125	0.001	7.9893e-21	Olfr912	Gm18076
5.80001e-25	0.576171	0.25	0.004	2.15105e-20	Olfr912	Gdf15
2.29241e-24	0.575419	0.25	0.005	8.50186e-20	Olfr912	Lamc1
3.0326e-24	0.381044	0.125	0.001	1.1247e-19	Olfr912	Igtp
3.1746e-23	0.336886	0.125	0.001	1.17736e-18	Olfr912	Rpl31-ps4
3.25401e-23	0.433244	0.25	0.005	1.20682e-18	Olfr912	Tor3a
2.92674e-22	0.502021	0.125	0.001	1.08544e-17	Olfr912	9330121K16Rik
3.09039e-22	0.335783	0.125	0.001	1.14613e-17	Olfr912	Gm26541
2.15254e-21	0.504412	0.125	0.001	7.98313e-17	Olfr912	Gm17638
2.33986e-21	0.33505	0.125	0.001	8.67783e-17	Olfr912	Grk2
1.49293e-20	0.380472	0.125	0.001	5.53684e-16	Olfr912	Gm6066
1.49293e-20	0.311885	0.125	0.001	5.53684e-16	Olfr912	Ldb3
1.50795e-20	0.378933	0.125	0.001	5.59253e-16	Olfr912	Anxa11
1.52312e-20	0.344317	0.125	0.001	5.64878e-16	Olfr912	Gm48780
1.52312e-20	0.32499	0.125	0.001	5.64878e-16	Olfr912	Tjp3
2.36274e-19	1.24592	0.375	0.013	8.76269e-15	Olfr912	Sprr1a
1.43248e-18	0.667642	0.5	0.023	5.31264e-14	Olfr912	Zfp771
1.74402e-18	0.334819	0.125	0.002	6.46805e-14	Olfr912	Gm24951
5.28238e-18	0.436661	0.25	0.006	1.95908e-13	Olfr912	Gm10059
6.99758e-18	0.37933	0.125	0.002	2.59519e-13	Olfr912	Shc2
1.59452e-17	0.831456	0.5	0.024	5.91358e-13	Olfr912	S100a1
3.13293e-17	0.622436	0.375	0.014	1.16191e-12	Olfr912	Ercc8
3.96158e-17	0.448219	0.25	0.007	1.46923e-12	Olfr912	Gm47402
5.17026e-17	0.58626	0.25	0.007	1.9175e-12	Olfr912	5330434G04Rik
7.75716e-17	1.05487	0.625	0.04	2.8769e-12	Olfr912	Snrpn
8.01837e-17	0.501551	0.125	0.002	2.97377e-12	Olfr912	Gm14107
8.41657e-17	0.377178	0.125	0.002	3.12145e-12	Olfr912	Gm9012
8.62292e-17	0.343209	0.125	0.002	3.19798e-12	Olfr912	Gabrb3
1.68779e-16	0.575503	0.25	0.007	6.25949e-12	Olfr912	Fez2
2.69281e-16	0.328876	0.125	0.002	9.98681e-12	Olfr912	Gm37860
3.51529e-16	1.22549	0.25	0.007	1.30372e-11	Olfr912	Snx8
3.73006e-16	1.11018	0.5	0.027	1.38337e-11	Olfr912	Plvap
3.75779e-16	1.25988	0.625	0.042	1.39365e-11	Olfr912	Ptprn
6.59413e-16	0.836418	0.125	0.002	2.44556e-11	Olfr912	Tyrobp
7.73388e-16	0.323761	0.125	0.002	2.86826e-11	Olfr912	Gm37634
7.79274e-16	0.322141	0.125	0.002	2.8901e-11	Olfr912	Gm4825
7.9118e-16	0.328144	0.125	0.002	2.93425e-11	Olfr912	4930525G20Rik
1.95452e-15	0.499118	0.125	0.002	7.24874e-11	Olfr912	Actg2
2.05794e-15	0.344933	0.125	0.002	7.63226e-11	Olfr912	Gm42694
5.16272e-15	0.404628	0.25	0.008	1.9147e-10	Olfr912	Foxn3
6.29317e-15	2.82533	0.5	0.03	2.33395e-10	Olfr912	Avp
7.04129e-15	0.752656	0.375	0.017	2.6114e-10	Olfr912	Tbc1d16
9.77608e-15	0.484658	0.25	0.008	3.62565e-10	Olfr912	Gm6317
1.00598e-14	0.474774	0.25	0.008	3.7309e-10	Olfr912	Rpusd4
1.74914e-14	1.26573	0.75	0.066	6.48705e-10	Olfr912	Ciapin1
2.92659e-14	0.332982	0.125	0.002	1.08538e-09	Olfr912	Nuak1
3.00688e-14	0.34108	0.125	0.002	1.11516e-09	Olfr912	Shcbp1l
3.4965e-14	0.93897	0.375	0.018	1.29675e-09	Olfr912	S100a4
6.69553e-14	0.494408	0.125	0.002	2.48317e-09	Olfr912	Tuba1c
6.73978e-14	0.34178	0.125	0.002	2.49958e-09	Olfr912	Gm20703
1.2751e-13	0.604407	0.125	0.002	4.72897e-09	Olfr912	Taf4b
1.31676e-13	0.600682	0.125	0.002	4.88346e-09	Olfr912	Gm47572
1.33379e-13	0.496804	0.125	0.002	4.94663e-09	Olfr912	Gm13904
1.58595e-13	0.570351	0.25	0.008	5.88183e-09	Olfr912	Fntb
2.98191e-13	0.431137	0.25	0.009	1.1059e-08	Olfr912	Apba3
5.82348e-13	0.340398	0.125	0.002	2.15976e-08	Olfr912	Gm9372
7.09566e-13	0.283859	0.25	0.009	2.63157e-08	Olfr912	Klhl2
7.13114e-13	0.874909	0.5	0.034	2.64473e-08	Olfr912	Golph3l
7.52237e-13	0.415975	0.25	0.009	2.78982e-08	Olfr912	Gm6392
9.67513e-13	0.97261	0.625	0.051	3.58821e-08	Olfr912	Ccdc32
1.11434e-12	0.37441	0.125	0.002	4.13274e-08	Olfr912	Rbmx2-ps
1.1549e-12	0.327629	0.125	0.002	4.28317e-08	Olfr912	Sumo2
1.42439e-12	0.291046	0.25	0.009	5.28265e-08	Olfr912	Gm3695
1.55809e-12	0.659455	0.25	0.009	5.77849e-08	Olfr912	Pde10a
2.15552e-12	0.31682	0.125	0.002	7.99419e-08	Olfr912	Gm42611
2.16816e-12	1.05857	0.5	0.035	8.04105e-08	Olfr912	Hap1
3.19876e-12	0.744328	0.375	0.021	1.18632e-07	Olfr912	Prrg4
3.35416e-12	0.497136	0.125	0.002	1.24396e-07	Olfr912	Gm2387
4.76751e-12	0.850504	0.5	0.036	1.76813e-07	Olfr912	Fahd1
6.43207e-12	0.567507	0.125	0.002	2.38546e-07	Olfr912	Smad9
6.55861e-12	0.327924	0.125	0.002	2.43239e-07	Olfr912	Jakmip3
1.09702e-11	0.572399	0.375	0.021	4.06852e-07	Olfr912	Man2b1
1.90375e-11	0.693356	0.25	0.01	7.06043e-07	Olfr912	Rab8b
1.9472e-11	0.335645	0.125	0.003	7.22158e-07	Olfr912	Ssc5d
2.38577e-11	0.421093	0.25	0.01	8.84811e-07	Olfr912	Rtn4ip1
3.21453e-11	0.322537	0.125	0.003	1.19217e-06	Olfr912	4930524J08Rik
4.16344e-11	0.659378	0.25	0.01	1.54409e-06	Olfr912	Grk5
5.22692e-11	0.325719	0.125	0.003	1.93851e-06	Olfr912	Appl2
6.70533e-11	0.723448	0.25	0.011	2.4868e-06	Olfr912	Ldlr
6.87733e-11	0.559854	0.25	0.011	2.5506e-06	Olfr912	Kdm4b
7.5591e-11	0.657636	0.375	0.023	2.80344e-06	Olfr912	Kif17
7.69492e-11	0.489601	0.125	0.003	2.85381e-06	Olfr912	Mcm2
7.96968e-11	0.492041	0.125	0.003	2.95572e-06	Olfr912	Pprc1
1.21915e-10	0.490801	0.125	0.003	4.52148e-06	Olfr912	Gm18899
1.29316e-10	0.323396	0.125	0.003	4.79593e-06	Olfr912	Gpr85
1.76656e-10	0.932477	0.25	0.011	6.55162e-06	Olfr912	Rps6ka3
2.03036e-10	0.313853	0.125	0.003	7.53e-06	Olfr912	Kcnt1
2.04999e-10	0.312015	0.125	0.003	7.60279e-06	Olfr912	Mr1
2.06631e-10	0.813789	0.5	0.041	7.66333e-06	Olfr912	Rbl2
2.70089e-10	0.680691	0.375	0.024	1.00168e-05	Olfr912	Tma16
2.96192e-10	0.33707	0.125	0.003	1.09849e-05	Olfr912	Gm6560
2.99003e-10	0.335566	0.125	0.003	1.10891e-05	Olfr912	Gm14929
3.50167e-10	0.558856	0.25	0.011	1.29866e-05	Olfr912	Lbh
3.66552e-10	0.528859	0.25	0.011	1.35943e-05	Olfr912	Tap2
3.68289e-10	0.654188	0.25	0.011	1.36587e-05	Olfr912	Catsper2
3.87776e-10	1.07603	0.375	0.026	1.43814e-05	Olfr912	Pcsk1n
4.44311e-10	0.321025	0.125	0.003	1.64782e-05	Olfr912	Oplah
4.99832e-10	0.963219	0.875	0.119	1.85373e-05	Olfr912	Il6st
8.67992e-10	0.487273	0.125	0.003	3.21912e-05	Olfr912	Fam221b
9.15875e-10	0.368442	0.125	0.003	3.39671e-05	Olfr912	Gm7887
1.10939e-09	0.2704	0.25	0.012	4.11441e-05	Olfr912	Ddx19b
1.21874e-09	0.493226	0.125	0.003	4.51993e-05	Olfr912	Sugct
1.31333e-09	0.364721	0.125	0.003	4.87074e-05	Olfr912	Ltbp3
1.50382e-09	0.258207	0.25	0.012	5.57722e-05	Olfr912	E130317F20Rik
1.81269e-09	0.370545	0.125	0.003	6.72272e-05	Olfr912	Gm14892
1.86027e-09	0.333639	0.125	0.003	6.89917e-05	Olfr912	Gm20519
1.86831e-09	0.323195	0.125	0.003	6.92901e-05	Olfr912	Rps12-ps2
1.88929e-09	0.720964	0.375	0.027	7.00681e-05	Olfr912	1700037C18Rik
1.89753e-09	0.5478	0.375	0.026	7.03738e-05	Olfr912	2700097O09Rik
2.09076e-09	0.658992	0.375	0.027	7.75402e-05	Olfr912	Irgq
2.3757e-09	0.872263	0.5	0.046	8.81074e-05	Olfr912	Zmym1
2.59487e-09	0.746565	0.625	0.068	9.62358e-05	Olfr912	Tmem183a
2.62662e-09	0.31871	0.125	0.003	9.74133e-05	Olfr912	Zfp955a
2.65972e-09	1.0104	0.625	0.071	9.86412e-05	Olfr912	Hmgcr
4.24148e-09	1.04772	0.375	0.029	0.000157304	Olfr912	Rnf130
4.49523e-09	0.590424	0.125	0.003	0.000166715	Olfr912	Brca2
4.76146e-09	0.334456	0.125	0.003	0.000176588	Olfr912	Gm44560
4.84336e-09	0.768303	0.25	0.013	0.000179626	Olfr912	Zfp668
4.88228e-09	0.565538	0.5	0.046	0.000181069	Olfr912	Flot1
5.00182e-09	0.327505	0.125	0.003	0.000185502	Olfr912	Exd1
6.5942e-09	0.314219	0.125	0.003	0.000244559	Olfr912	Gm10290
7.47964e-09	0.374054	0.25	0.013	0.000277397	Olfr912	Slc5a6
8.44882e-09	0.484349	0.125	0.004	0.000313341	Olfr912	Ociad2
9.07538e-09	0.321068	0.125	0.004	0.000336579	Olfr912	Gm15807
9.74935e-09	0.403378	0.375	0.028	0.000361574	Olfr912	Atp2b4
1.03658e-08	0.26652	0.25	0.013	0.000384436	Olfr912	Tpm3-rs7
1.06035e-08	0.539574	0.25	0.014	0.000393254	Olfr912	Cyb5r2
1.10042e-08	1.10704	0.625	0.076	0.000408115	Olfr912	Mbl2
1.14371e-08	0.323337	0.125	0.004	0.000424169	Olfr912	Gm6520
1.15722e-08	0.323495	0.125	0.004	0.000429178	Olfr912	Gm36378
1.20337e-08	0.308439	0.125	0.004	0.000446293	Olfr912	C030014I23Rik
1.246e-08	0.760615	0.5	0.049	0.000462103	Olfr912	Pls3
1.38326e-08	0.945114	0.375	0.03	0.00051301	Olfr912	Galnt15
1.45907e-08	0.486456	0.125	0.004	0.000541124	Olfr912	Gm10366
1.59691e-08	0.814468	0.5	0.051	0.000592247	Olfr912	Ibtk
1.67447e-08	0.666625	0.25	0.014	0.000621011	Olfr912	Cfp
2.21582e-08	0.507508	0.375	0.03	0.000821782	Olfr912	Nrip1
2.68308e-08	0.656238	0.375	0.031	0.000995074	Olfr912	Dlg3
2.68489e-08	0.795653	0.5	0.052	0.000995744	Olfr912	Sort1
2.77792e-08	0.73873	0.5	0.051	0.00103025	Olfr912	Dclk1
2.88463e-08	0.551827	0.25	0.014	0.00106982	Olfr912	Wdr55
2.98059e-08	0.432002	0.25	0.014	0.00110541	Olfr912	Klhl26
3.24717e-08	0.432076	0.25	0.014	0.00120428	Olfr912	Uqcrh-ps1
3.42738e-08	0.311419	0.125	0.004	0.00127111	Olfr912	S100a10
3.46638e-08	0.537822	0.25	0.014	0.00128558	Olfr912	Gm5652
3.90578e-08	0.517154	0.25	0.014	0.00144854	Olfr912	Trim47
4.19908e-08	0.310801	0.125	0.004	0.00155731	Olfr912	Gm43755
4.26047e-08	0.321688	0.125	0.004	0.00158008	Olfr912	Gm15148
4.32009e-08	0.419521	0.375	0.031	0.00160219	Olfr912	Polg2
4.66687e-08	0.43393	0.25	0.015	0.0017308	Olfr912	Amacr
4.87833e-08	0.665889	0.375	0.031	0.00180923	Olfr912	Mgat2
5.04227e-08	0.484424	0.125	0.004	0.00187003	Olfr912	Dzip1
5.08831e-08	0.518703	0.375	0.031	0.0018871	Olfr912	Slc16a7
5.17029e-08	0.481011	0.125	0.004	0.00191751	Olfr912	Gm43359
5.22611e-08	0.364913	0.125	0.004	0.00193821	Olfr912	Gm8807
6.65006e-08	0.313172	0.125	0.004	0.00246631	Olfr912	Pdzd9
6.74231e-08	0.420572	0.25	0.015	0.00250052	Olfr912	Gm7832
7.25582e-08	0.628987	0.375	0.032	0.00269097	Olfr912	Tceanc2
7.60178e-08	0.626937	0.375	0.032	0.00281927	Olfr912	Ubxn2b
8.09827e-08	0.618416	0.25	0.015	0.0030034	Olfr912	Tceanc
9.77769e-08	0.586205	0.375	0.032	0.00362625	Olfr912	Cln5
1.00366e-07	0.638872	0.375	0.033	0.00372227	Olfr912	Wdr12
1.12556e-07	0.501411	0.25	0.015	0.00417438	Olfr912	Gm10073
1.18175e-07	0.430779	0.25	0.015	0.00438277	Olfr912	Mark1
1.19393e-07	0.497366	0.375	0.033	0.00442792	Olfr912	Hras
1.28507e-07	0.576636	0.5	0.055	0.00476593	Olfr912	Tctn3
1.5045e-07	0.315388	0.25	0.016	0.00557975	Olfr912	Fxyd2
1.58794e-07	0.363888	0.125	0.004	0.00588918	Olfr912	Gm4217
1.7283e-07	0.602348	0.375	0.034	0.00640976	Olfr912	Ctnnd2
1.96077e-07	0.32906	0.125	0.004	0.00727191	Olfr912	Rplp1-ps1
2.10647e-07	0.4948	0.375	0.034	0.00781225	Olfr912	2020-09-11
2.24911e-07	0.480512	0.125	0.004	0.00834128	Olfr912	Gm37254
2.28954e-07	0.600633	0.75	0.112	0.00849121	Olfr912	Mrpl28
2.33109e-07	0.339816	0.125	0.004	0.0086453	Olfr912	Rbm44
2.33654e-07	0.878973	0.625	0.087	0.00866554	Olfr912	Xbp1
2.63424e-07	0.354056	0.25	0.016	0.0097696	Olfr912	Vim
2.73108e-07	0.434572	0.25	0.016	0.0101288	Olfr912	Wdr24
2.76629e-07	0.6155	0.375	0.035	0.0102593	Olfr912	Syvn1
2.87266e-07	0.647923	0.5	0.058	0.0106538	Olfr912	Msmo1
2.99955e-07	0.362555	0.25	0.016	0.0111244	Olfr912	Mipol1
3.02242e-07	0.383055	0.25	0.016	0.0112092	Olfr912	Donson
3.13637e-07	0.480199	0.375	0.034	0.0116318	Olfr912	Poldip2
3.63114e-07	0.689196	0.375	0.035	0.0134668	Olfr912	Lgals3bp
3.69423e-07	0.370594	0.25	0.017	0.0137008	Olfr912	Recql5
3.86912e-07	0.532479	0.5	0.058	0.0143494	Olfr912	Lmo2
4.55297e-07	0.721548	0.375	0.036	0.0168856	Olfr912	Dbndd1
4.91182e-07	0.662619	0.5	0.06	0.0182165	Olfr912	Gpx1
4.91727e-07	0.712251	0.5	0.061	0.0182367	Olfr912	Mybbp1a
4.9296e-07	0.308308	0.125	0.005	0.0182824	Olfr912	Scd3
5.01912e-07	0.775629	0.375	0.037	0.0186144	Olfr912	Sox4
5.09826e-07	0.595633	0.375	0.036	0.0189079	Olfr912	Snx32
5.31904e-07	0.603004	0.5	0.06	0.0197267	Olfr912	Chd3
5.51287e-07	0.481093	0.125	0.005	0.0204456	Olfr912	Gm43598
7.54259e-07	0.850813	0.25	0.018	0.0279732	Olfr912	Rgs7bp
7.65506e-07	0.621109	0.25	0.018	0.0283903	Olfr912	Kctd10
7.74583e-07	0.622185	0.5	0.062	0.028727	Olfr912	Eno2
7.78465e-07	0.489068	0.25	0.017	0.0288709	Olfr912	Usp2
8.7291e-07	0.360394	0.25	0.018	0.0323736	Olfr912	Ocln
9.14231e-07	0.362802	0.125	0.005	0.0339061	Olfr912	Gm6335
9.27885e-07	0.366983	0.25	0.018	0.0344125	Olfr912	Zfp654
9.35356e-07	0.502529	0.375	0.037	0.0346896	Olfr912	4933421O10Rik
9.68655e-07	0.510004	0.5	0.061	0.0359245	Olfr912	Zbtb4
9.9848e-07	0.755301	0.75	0.128	0.0370306	Olfr912	Ppargc1a
1.05731e-06	0.500839	0.25	0.018	0.0392126	Olfr912	Zfhx4
1.17516e-06	0.588665	0.25	0.018	0.0435831	Olfr912	Nr2f6
1.34323e-06	0.966542	0.625	0.1	0.0498162	Olfr912	Ttc1

## Sheet: 1295
p_val	avg_logFC	pct.1	pct.2	p_val_adj	cluster	gene
1.91378e-10	0.428773	0.111	0.009	7.09763e-06	Olfr1295	Pde10a
3.00514e-09	0.786791	0.972	0.78	0.000111452	Olfr1295	Pcp4l1
2.246e-08	0.887812	0.694	0.287	0.000832974	Olfr1295	Dlg2
2.8731e-08	0.540981	0.139	0.017	0.00106555	Olfr1295	Mettl5os
3.50415e-08	0.67237	0.556	0.185	0.00129958	Olfr1295	Sorl1
4.54747e-08	0.839297	0.278	0.061	0.00168652	Olfr1295	Cfap77
6.3651e-08	0.764993	0.639	0.251	0.00236062	Olfr1295	Syt4
1.22591e-07	0.496903	0.222	0.042	0.00454655	Olfr1295	Ptprn
1.36684e-07	0.816887	0.417	0.124	0.00506921	Olfr1295	Hectd2os
1.46172e-07	0.552009	0.389	0.105	0.00542108	Olfr1295	Nrp1
2.50881e-07	0.336475	0.111	0.013	0.00930443	Olfr1295	Pygb
2.73937e-07	0.655987	0.194	0.035	0.0101595	Olfr1295	Hap1
3.27336e-07	0.912498	0.667	0.323	0.0121399	Olfr1295	Kcnmb3
3.69569e-07	0.698351	0.167	0.028	0.0137062	Olfr1295	Uty
5.02623e-07	0.632093	0.333	0.091	0.0186408	Olfr1295	Pirt
6.55138e-07	0.630641	1	0.953	0.0242971	Olfr1295	S100a5
8.63457e-07	0.663119	0.25	0.058	0.032023	Olfr1295	Zfp414

## Sheet: 1437
p_val	avg_logFC	pct.1	pct.2	p_val_adj	cluster	gene
2.88755e-32	0.645203	0.118	0.002	1.07091e-27	Olfr1437	Vmn1r4
8.1011e-25	0.568679	0.118	0.002	3.00446e-20	Olfr1437	Sdcbp2
4.90058e-14	0.494082	0.176	0.008	1.81748e-09	Olfr1437	Gm8738
2.92574e-13	0.535658	0.118	0.004	1.08507e-08	Olfr1437	Mir7078
1.74686e-12	0.728278	0.118	0.004	6.47857e-08	Olfr1437	A430105J06Rik
2.43488e-12	1.00004	0.235	0.017	9.03024e-08	Olfr1437	Tbc1d16
3.06263e-12	1.01063	0.118	0.004	1.13584e-07	Olfr1437	Plp1
3.25552e-12	0.822772	0.118	0.004	1.20737e-07	Olfr1437	Gm15191
2.34217e-10	0.716237	0.235	0.02	8.68641e-06	Olfr1437	Zfp787
4.08281e-10	0.392225	0.118	0.005	1.51419e-05	Olfr1437	Pars2
2.0779e-09	0.858723	0.118	0.006	7.7063e-05	Olfr1437	Snrnp40
5.77486e-09	1.071	0.588	0.123	0.000214172	Olfr1437	Kalrn
4.47231e-08	0.530029	0.118	0.007	0.00165865	Olfr1437	Lpin3
5.78999e-08	0.855156	0.235	0.026	0.00214733	Olfr1437	Mdn1
7.32986e-08	1.32653	0.235	0.027	0.00271843	Olfr1437	Hcfc1
1.66929e-07	0.553655	0.118	0.007	0.00619088	Olfr1437	Zfp963
8.78894e-07	0.388748	0.176	0.018	0.0325955	Olfr1437	Mitf
1.138e-06	0.443902	0.176	0.018	0.0422049	Olfr1437	Dynlt1b
1.29194e-06	0.809321	0.235	0.031	0.0479143	Olfr1437	Arl16
1.32543e-06	0.972071	0.353	0.066	0.0491563	Olfr1437	Ciapin1

## Sheet: 235
p_val	avg_logFC	pct.1	pct.2	p_val_adj	cluster	gene
7.15323e-26	1.24351	0.28	0.016	2.65292e-21	Olfr235	Gm7534
1.13733e-13	0.912731	0.16	0.01	4.21801e-09	Olfr235	Prr15l
1.38505e-13	1.00882	0.16	0.01	5.13673e-09	Olfr235	Kcnrg
2.32855e-12	1.31439	0.56	0.114	8.6359e-08	Olfr235	Cd55
2.53213e-09	0.277869	0.12	0.009	9.39093e-05	Olfr235	Gm42716
5.03158e-09	0.394201	0.12	0.009	0.000186606	Olfr235	5330439K02Rik
5.23608e-08	0.941728	0.88	0.538	0.00194191	Olfr235	Sgpl1
2.02834e-07	0.358904	0.12	0.011	0.00752251	Olfr235	Gm10180
2.02989e-07	0.850239	0.32	0.064	0.00752826	Olfr235	Nfx1
2.71586e-07	0.811137	0.96	0.653	0.0100723	Olfr235	Dcdc2a
5.41351e-07	0.390296	0.16	0.02	0.0200771	Olfr235	Gm44109
7.10828e-07	0.59313	0.28	0.053	0.0263625	Olfr235	Atxn2
1.09832e-06	0.846651	0.4	0.104	0.0407336	Olfr235	Stbd1
