# Supplementary material for: Semiochemical responsive olfactory sensory neurons are sexually dimorphic and plastic
Source: eLife. 2020 Nov 24;9:e54501. doi: 10.7554/eLife.54501 (PMC7732343; doi:10.7554/eLife.54501)
Supplement: Figure 9—source data 1. [file elife-54501-fig9-data1.xlsx]

## Sheet: Sheet1
	Olfr910	Olfr912	Olfr1295
	sex-seperated female	sex-seperated female	sex-seperated female
	vs.	vs.	vs.
	sex-seperated male	sex-seperated male	sex-seperated male
Unpaired t test
P value	0.8926	0.6904	0.8993
P value summary	ns	ns	ns
Significantly different? (P < 0.05)	No	No	No
One- or two-tailed P value?	Two-tailed	Two-tailed	Two-tailed
t, df	t=0.1362 df=27	t=0.4034 df=23	t=0.1281 df=22
How big is the difference?
Mean ± SEM of column A	1.001 ± 0.09637, n=14	0.9006 ± 0.1497, n=12	0.4944 ± 0.03049, n=11
Mean ± SEM of column B	0.9773 ± 0.1381, n=15	0.8345 ± 0.07568, n=13	0.5059 ± 0.07816, n=13
Difference between means	-0.02326 ± 0.1707	-0.06607 ± 0.1638	0.01149 ± 0.08972
95% confidence interval	-0.3735 to 0.3270	-0.4049 to 0.2727	-0.1746 to 0.1976
R squared	0.0006869	0.007026	0.000745
F test to compare variances
F,DFn, Dfd	2.202, 14, 13	3.610, 11, 12	7.765, 12, 10
P value	0.1641	0.0367	0.0028
P value summary	ns	*	**
Significantly different? (P < 0.05)	No	Yes	Yes
