# Supplementary material for: Semiochemical responsive olfactory sensory neurons are sexually dimorphic and plastic
Source: eLife journal article supplement (doi:10.7554/elife.54501), 2020-11-24
Supplement: supp [file elife_poa_e54501_Figure_2_figure_supplement_1.pdf › elife_poa_e54501_Figure_2_figure_supplement_1.pdf]

A

Olfr910 Male

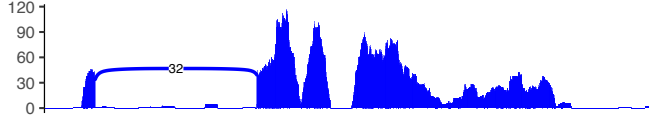

Olfr910 Female

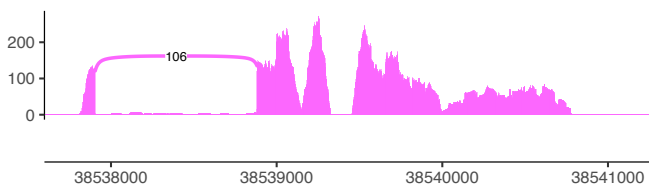

Riboprobe

ENSMUST00000215122.1

CDS

B

Olfr912 Male

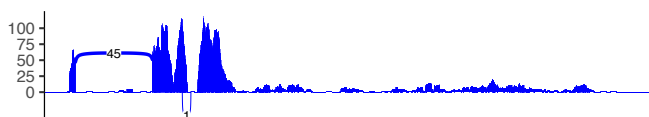

Olfr912 Female

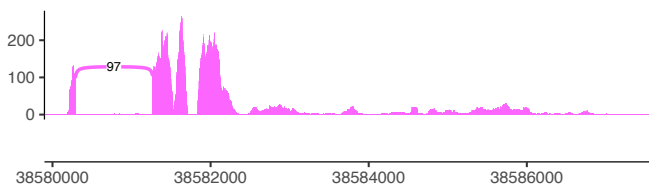

Riboprobe

ENSMUST00000217160.2

CDS

C

Olfr1295 Male

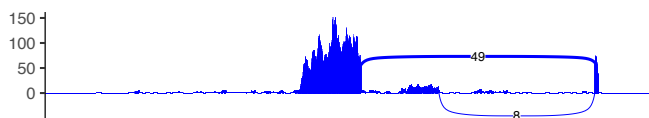

Olfr1295 Female

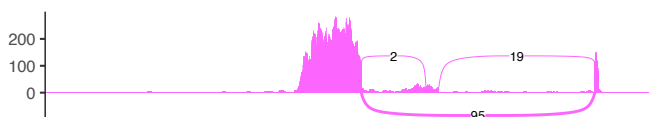

Riboprobe

ENSMUST00000217772.1

ENSMUST00000207786.2

ENSMUST00000207283.2

CDS
