# Supplementary material for: Semiochemical responsive olfactory sensory neurons are sexually dimorphic and plastic
Source: eLife journal article supplement (doi:10.7554/elife.54501), 2020-11-24

pS6-IP-Seq 1%  $\beta$ -caryophyllene, Olfr only

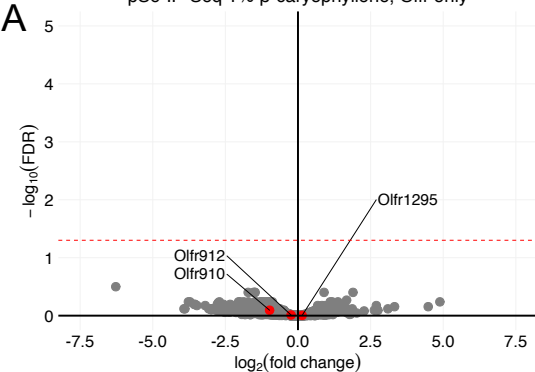

pS6-IP-Seq 1% 2-heptanone, Olfr only

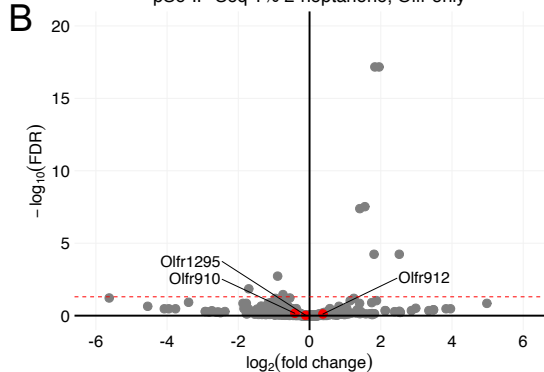

pS6-IP-Seq 100% (E)- $\beta$ -farnesene, Olfr only

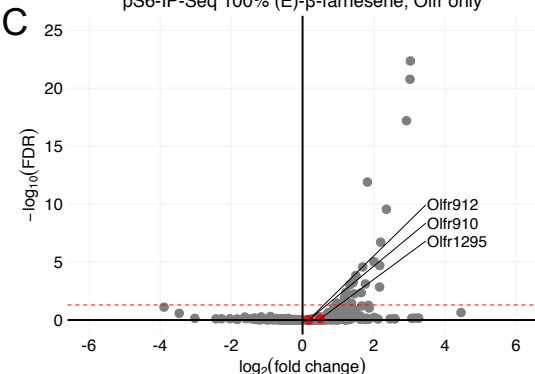

pS6-IP-Seq 77% DHB, Olfr only

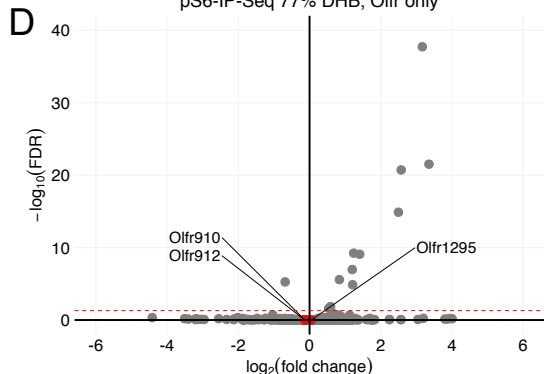

pS6-IP-Seq 1% 2,5-DMP, Olfr only

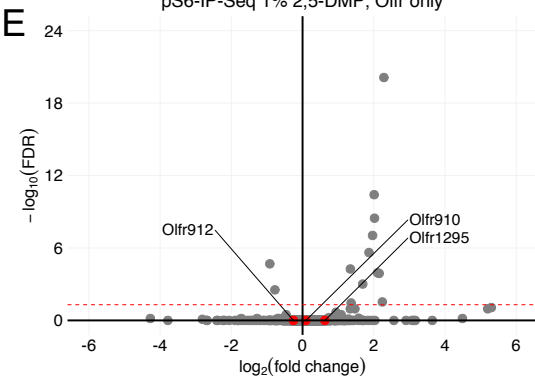

pS6-IP-Seq 1% SBT, Olfr only

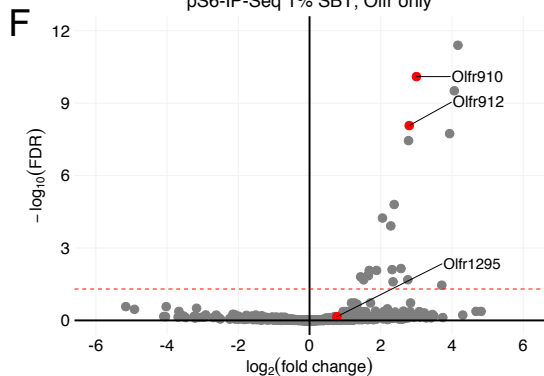

pS6-IP-Seq 100% SBT, Olfr only

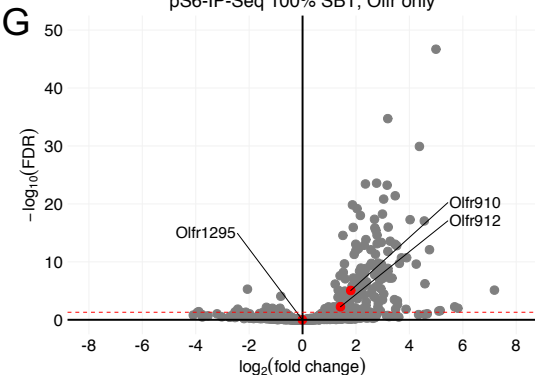

pS6-IP-Seq 10mM MTMT, Olfr only

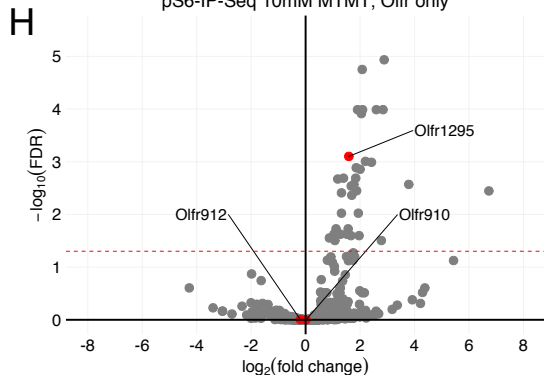

Supplement: supp [file elife_poa_e54501_Figure_4_figure_supplement_1.pdf › elife_poa_e54501_Figure_4_figure_supplement_1.pdf]
