# Supplementary material for: Semiochemical responsive olfactory sensory neurons are sexually dimorphic and plastic
Source: eLife journal article supplement (doi:10.7554/elife.54501), 2020-11-24

pS6-IP-Seq 1% 2-heptanone, Olfr only

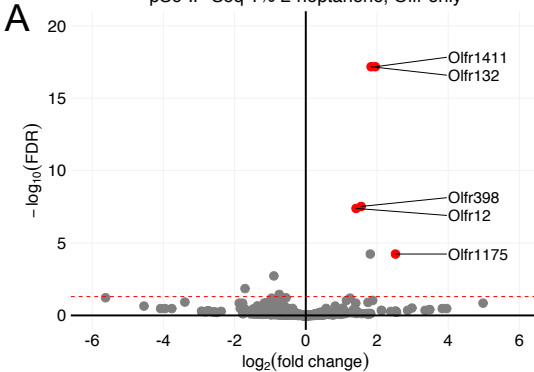

Sex-separated, 43-week-old, Olfr only

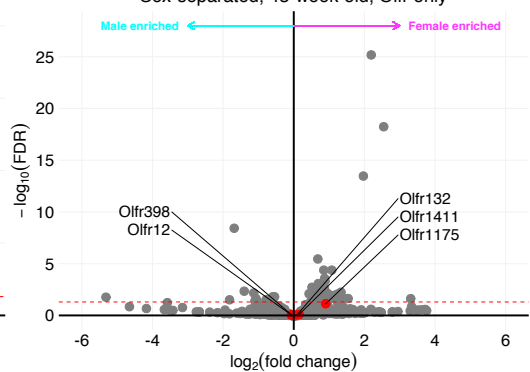

pS6-IP-Seq 100% (E)- $\beta$ -farnesene, Olfr only

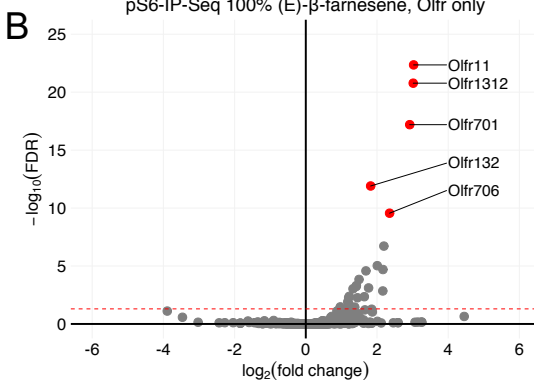

Sex-separated, 43-week-old, Olfr only

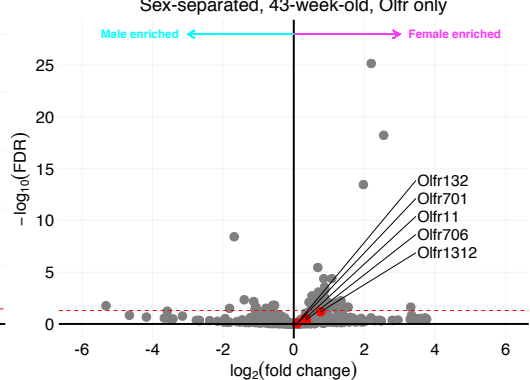

pS6-IP-Seq 77% DHB, Olfr only

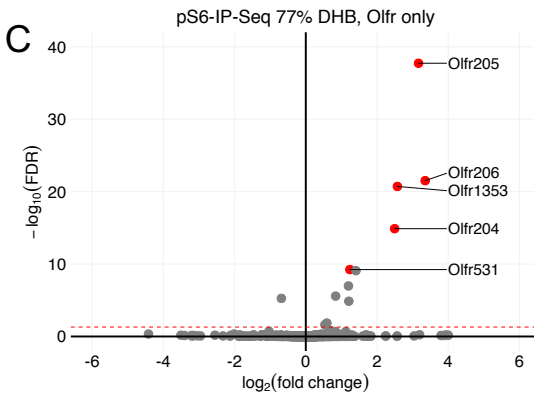

Sex-separated, 43-week-old, Olfr only

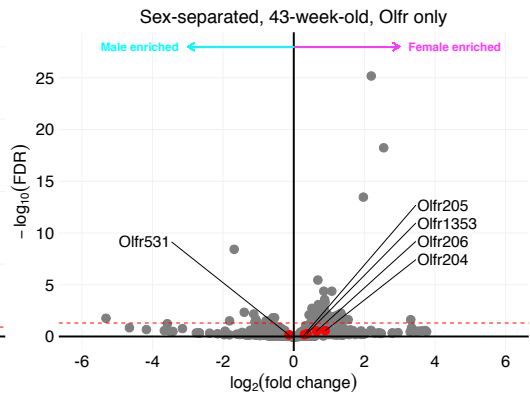

pS6-IP-Seq 1% 2,5-DMP, Olfr only

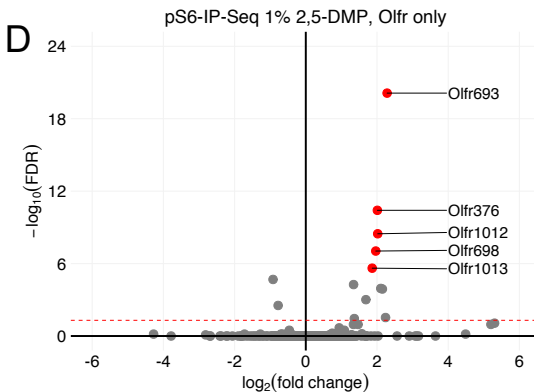

Sex-separated, 43-week-old, Olfr only

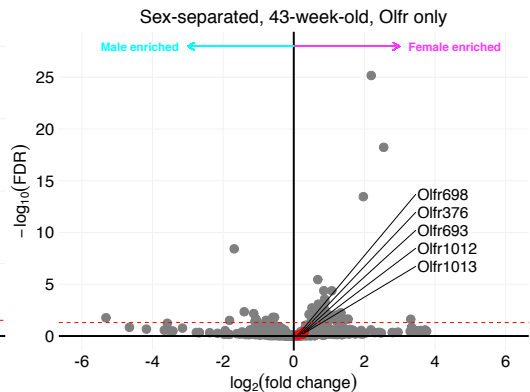

Supplement: supp [file elife_poa_e54501_Figure_4_figure_supplement_2.pdf › elife_poa_e54501_Figure_4_figure_supplement_2.pdf]
