# Supplementary figures and images for: Semiochemical responsive olfactory sensory neurons are sexually dimorphic and plastic
Source: eLife journal article supplement (doi:10.7554/elife.54501), 2020-11-24

**A**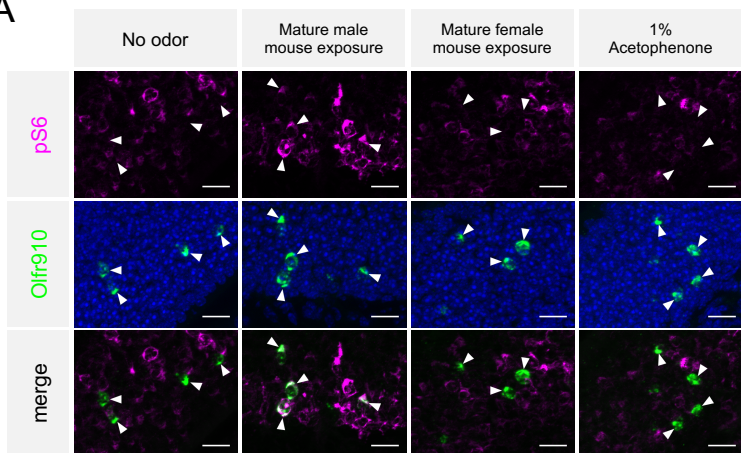**B**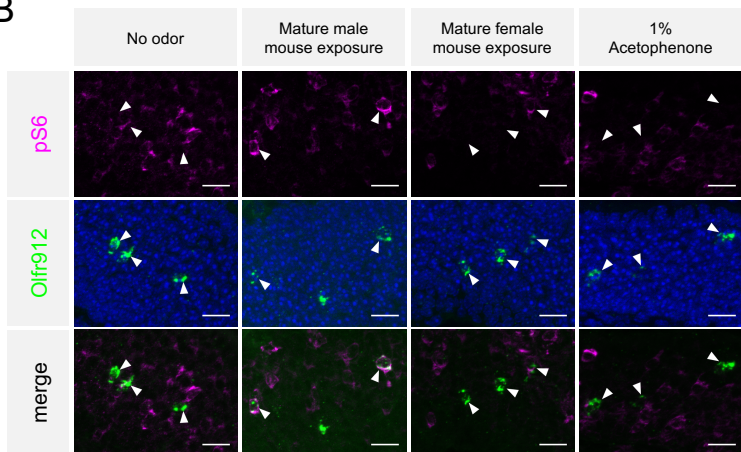**C**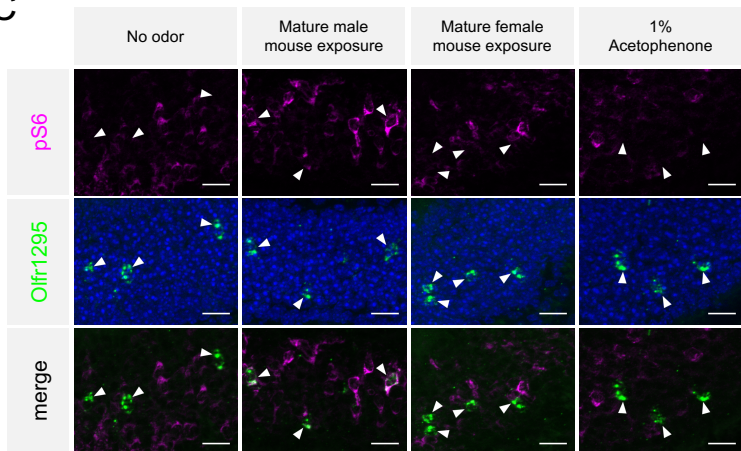

Supplement: supp [file elife_poa_e54501_Figure_3_figure_supplement_1.pdf › elife_poa_e54501_Figure_3_figure_supplement_1.pdf]

**A**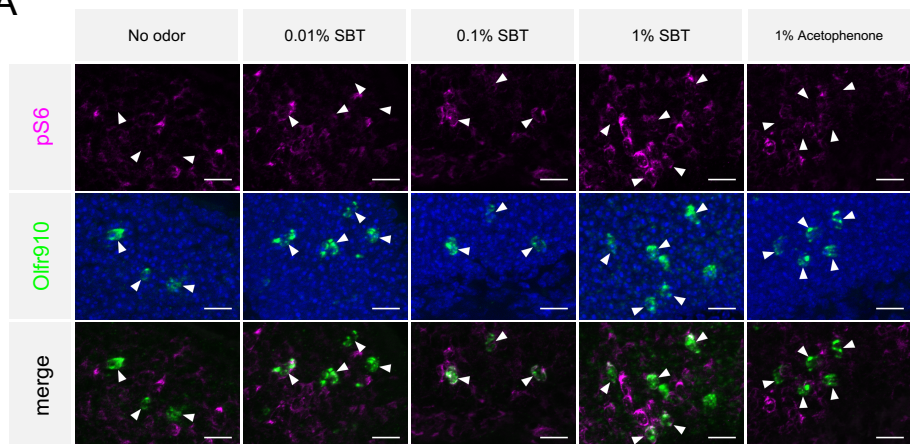**B**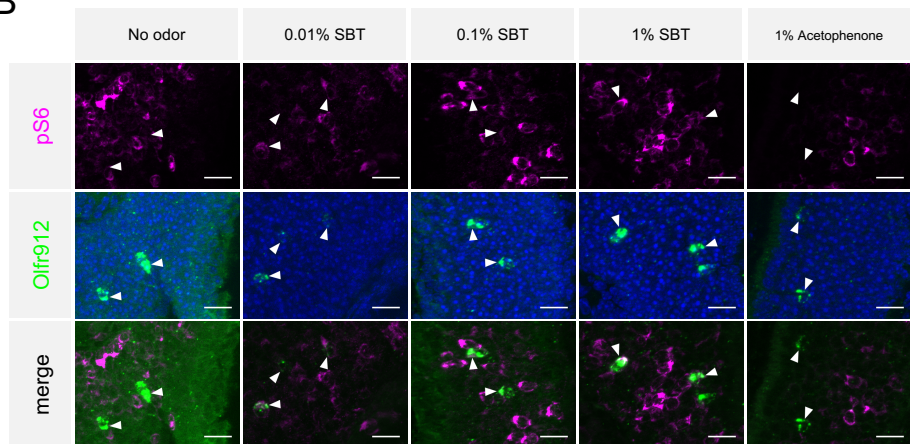**C**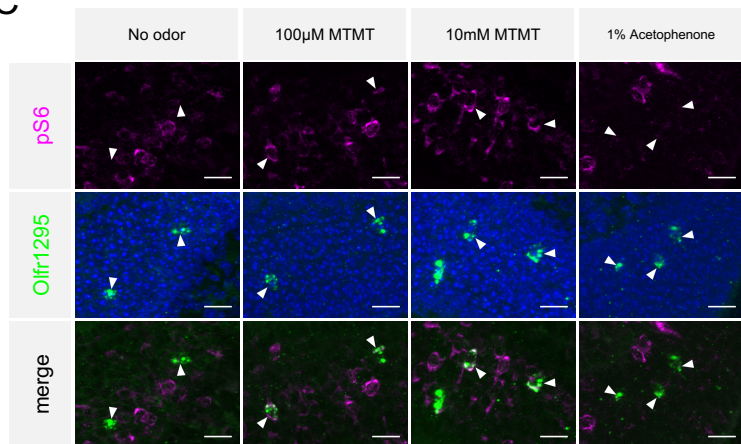

Supplement: supp [file elife_poa_e54501_Figure_4_figure_supplement_3.pdf › elife_poa_e54501_Figure_4_figure_supplement_3.pdf]

**A**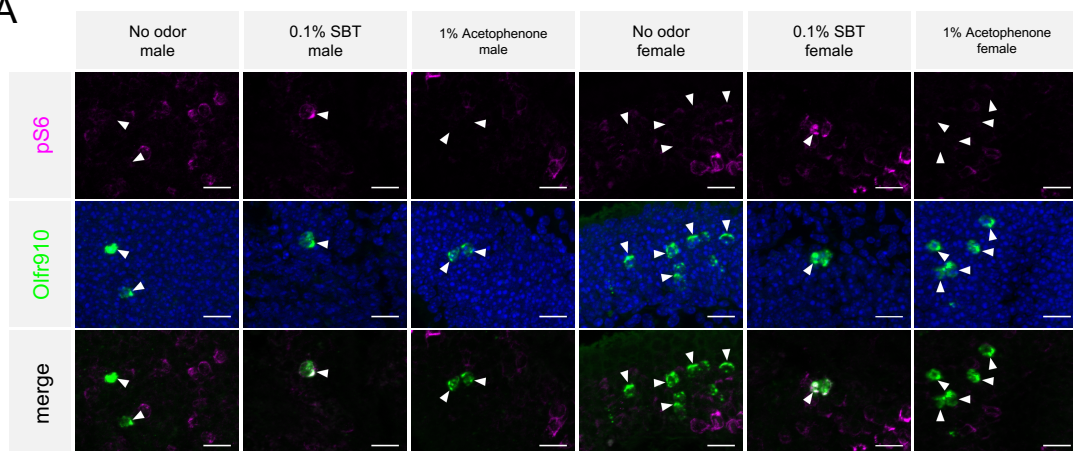**B**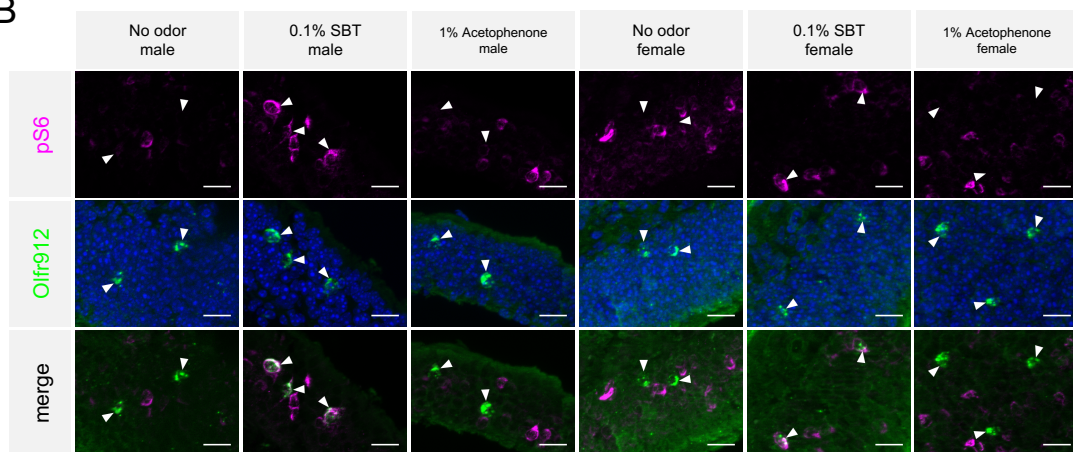**C**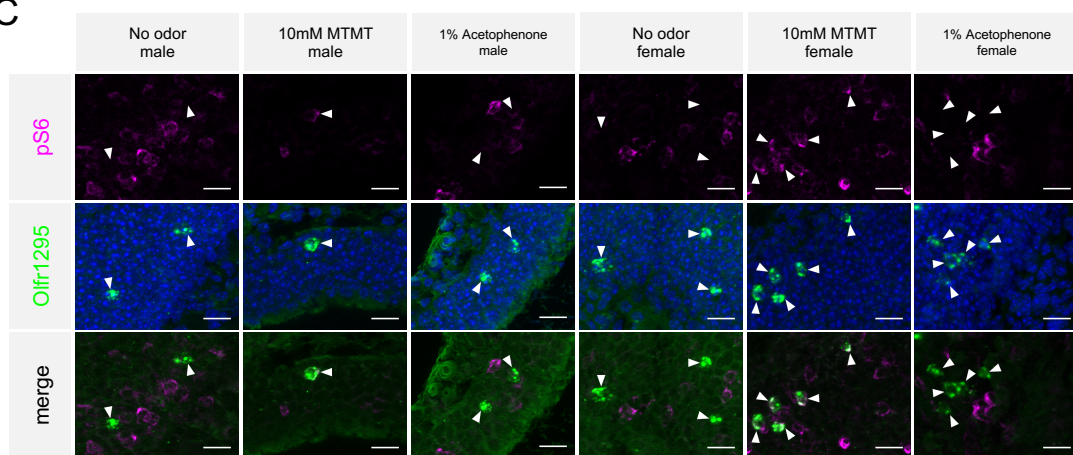

Supplement: supp [file elife_poa_e54501_Figure_5_figure_supplement_1.pdf › elife_poa_e54501_Figure_5_figure_supplement_1.pdf]

A

Olfr1437

Sex-separated  
male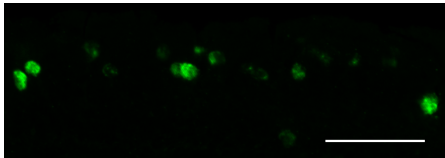Sex-separated  
female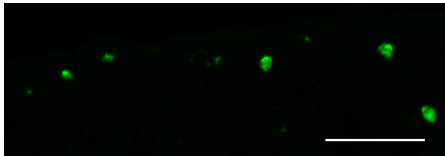

Olfr1437

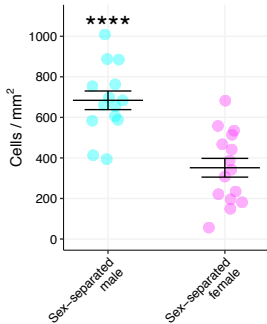

Supplement: supp [file elife_poa_e54501_Figure_7_figure_supplement_1.pdf › elife_poa_e54501_Figure_7_figure_supplement_1.pdf]

**A**Sex-separated, 26-week-old, Olfr only, *Bax*<sup>-/-</sup>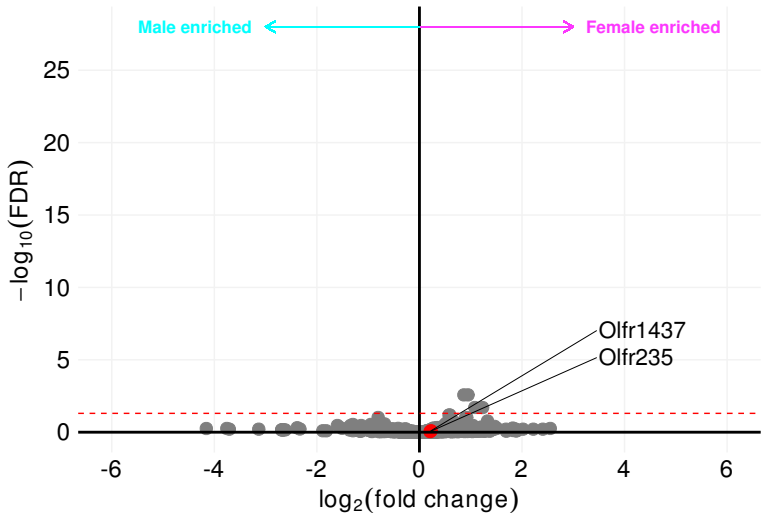

Supplement: supp [file elife_poa_e54501_Figure_9_figure_supplement_1.pdf › elife_poa_e54501_Figure_9_figure_supplement_1.pdf]

**A**

Male, sex-separated, 26-week-old, Olfr only

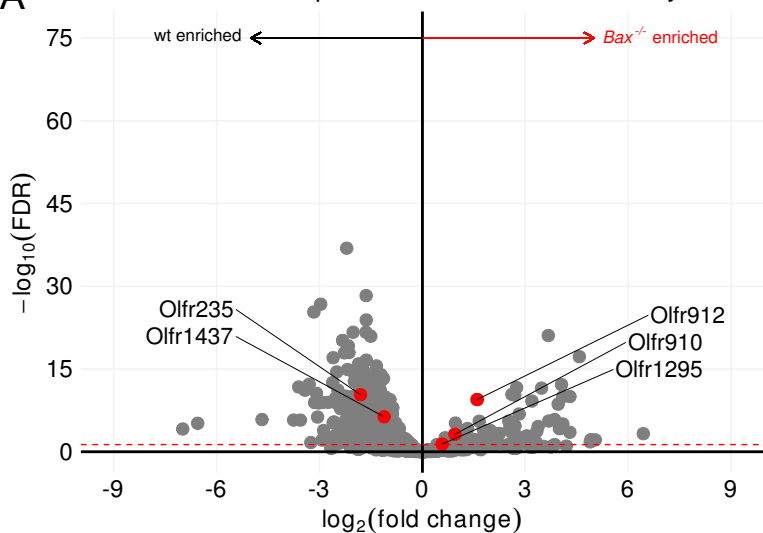**B**

Female, sex-separated, 26-week-old, Olfr only

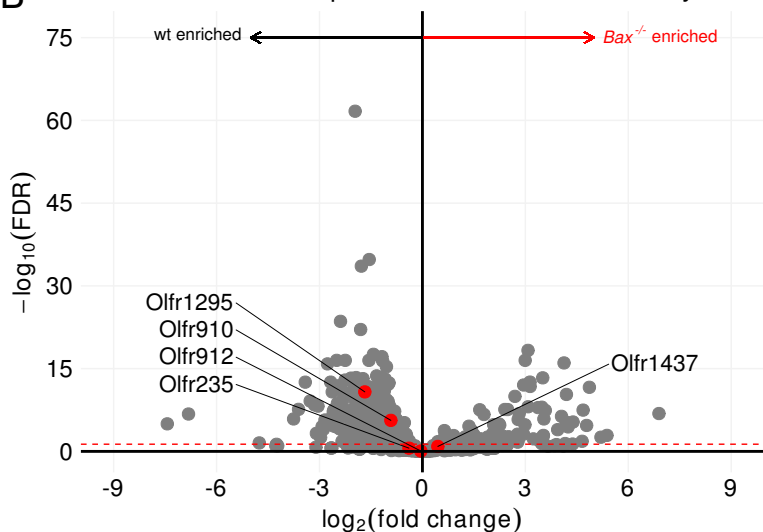

Supplement: supp [file elife_poa_e54501_Figure_9_figure_supplement_2.pdf › elife_poa_e54501_Figure_9_figure_supplement_2.pdf]
